# Supplementary material for: Metabolomic and Mitochondrial Fingerprinting of the Epithelial-to-Mesenchymal Transition (EMT) in Non-Tumorigenic and Tumorigenic Human Breast Cells
Source: MDPI journal article supplement (doi:10.3390/cancers14246214), 2022-12-16
Supplement: s1 [file s1]

**Metabolomic and Mitochondrial Fingerprinting of the  
Epithelial-to-Mesenchymal Transition (EMT) in  
Non-Tumorigenic and Tumorigenic Human Breast Cells**

**SUPPLEMENTAL INFORMATION**

**Table S1. Concentration of bioenergetic metabolites in HMLE/HMLE-EMT and HMLER/HMLER-EMT cells**

| Metabolite                           | HMLE        | HMLE-EMT     | HMLER       | HMLER-EMT    |
|--------------------------------------|-------------|--------------|-------------|--------------|
| Pyruvate <sup>c,d</sup>              | 3.8 (0.6)   | 2.4 (0.6)    | 2.7 (0.6)   | 21.4 (2.0)   |
| Lactate <sup>f</sup>                 | 78 (9)      | 83 (5)       | 86 (4)      | 551 (57)     |
| Alanine <sup>c,f</sup>               | 48 (12)     | 102 (12)     | 45 (6)      | 122 (22)     |
| Valine <sup>a,e</sup>                | 328 (17)    | 574 (43)     | 304 (17)    | 361 (43)     |
| Leucine <sup>a,d</sup>               | 428 (39)    | 676 (19)     | 493 (41)    | 419 (27)     |
| Isoleucine <sup>a,e</sup>            | 202 (28)    | 366 (11)     | 211 (28)    | 280 (30)     |
| Succinate <sup>c</sup>               | 6.4 (0.6)   | 5.9 (1.4)    | 7.1 (0.8)   | 3.7 (0.7)    |
| Fumarate <sup>c,f</sup>              | 0.7 (0.2)   | 2.3 (0.4)    | 0.9 (0.1)   | 5.4 (0.5)    |
| Serine <sup>a,e</sup>                | 516 (30)    | 959 (174)    | 502 (41)    | 632 (65)     |
| Oxaloacetate <sup>f</sup>            | 5.5 (1.3)   | 9.6 (0.6)    | 9.6 (1.9)   | 21.6 (2.7)   |
| Malate <sup>a,e,f</sup>              | 1.6 (0.1)   | 3.5 (0.9)    | 1.9 (0.4)   | 13.9 (0.8)   |
| Aspartate <sup>a,c,f</sup>           | 124 (8)     | 182 (30)     | 134 (12)    | 215 (24)     |
| Phosphoenolpyruvate <sup>a,c,f</sup> | 0.78 (0.25) | 10.40 (0.63) | 1.96 (0.24) | 84.67 (4.02) |
| Glutamate <sup>a,f</sup>             | 183 (16)    | 332 (29)     | 204 (25)    | 313 (21)     |
| Glutamine                            | 184 (167)   | 3490 (2215)  | 621 (321)   | 1512 (2742)  |
| Glyceraldehyde 3-P                   | ULOD        | ULOD         | ULOD        | 49 (8)       |
| 3-phosphoglycerate <sup>a,c,f</sup>  | 14.6 (0.8)  | 62.2 (10.2)  | 24.2 (5.8)  | 209.0 (7.7)  |
| Citrate <sup>d</sup>                 | 17.0 (3.4)  | 25.7 (4.0)   | 21.1 (2.4)  | 7.5 (0.6)    |
| Glucose <sup>a,f</sup>               | 6.4 (1.5)   | 22.7 (3.7)   | 8.5 (1.5)   | 24.2 (2.8)   |
| Ribose 5-P <sup>d</sup>              | 5.7 (1.4)   | 2.9 (0.5)    | 6.8 (0.6)   | 11.0 (1.9)   |
| Fructose 6-P <sup>a,e,f</sup>        | 2.7 (0.8)   | 34.5 (2.4)   | 6.2 (1.3)   | 12.6 (1.8)   |
| Glucose 6-P <sup>a</sup>             | 1.4 (0.1)   | 42.3 (3.0)   | 5.6 (1.2)   | 5.2 (0.3)    |
| Fructose 1,6-BisP <sup>a,b,d</sup>   | 2.1 (0.4)   | 34.9 (2.2)   | 5.8 (1.2)   | 4.5 (0.9)    |
| 6-P-gluconate <sup>a,d</sup>         | 20.6 (2.5)  | 33.0 (4.1)   | 24.3 (1.3)  | 21.9 (1.3)   |
| 3-hydroxybutyrate <sup>a,e,f</sup>   | 55 (9)      | 136 (7)      | 70 (6)      | 102 (15)     |
| Succinyl-CoA <sup>c</sup>            | 10.4 (1.8)  | 10.5 (3.1)   | 8.0 (1.1)   | 16.2 (1.9)   |
| Malonyl-CoA <sup>a,e,f</sup>         | 12.6 (2.1)  | 32.2 (4.5)   | 15.8 (2.3)  | 24.7 (2.9)   |
| $\alpha$ -ketoglutarate              | ULOD        | ULOD         | ULOD        | 0.25 (0.03)  |
| 2-hydroxyglutarate                   | ULOD        | ULOD         | ULOD        | 21 (2)       |

**Concentrations are shown in  $\mu\text{M}/\text{mg}$  of protein  $\pm$  SEM (n=5, in triplicate)**

Decimals were set according to the first significant digit of the measured SEM

<sup>a</sup> Changes between HMLE and HMLE-EMT are statistically significant (p-value < 0.05)

<sup>b</sup> Changes between HMLE and HMLER are statistically significant (p-value < 0.05)

<sup>c</sup> Changes between HMLER and HMLER-EMT are statistically significant (p-value < 0.05)

<sup>d</sup> Changes between HMLE-EMT and HMLER-EMT are statistically significant (p-value < 0.05)

<sup>e</sup> Changes between HMLER and HMLE-EMT are statistically significant (p-value < 0.05)

<sup>f</sup> Changes between HMLE and HMLER-EMT are statistically significant (p-value < 0.05)

ULOD: Upper Limit of Detection

**Table S2. Concentration of homocysteine-methionine 1C metabolites in HMLE/HMLE-EMT and HMLER/HMLER-EMT cells**

| <b>Metabolite</b>              | <b>HMLE</b>     | <b>HMLE-EMT</b> | <b>HMLER</b>    | <b>HMLER-EMT</b> |
|--------------------------------|-----------------|-----------------|-----------------|------------------|
| Cystathionine <sup>a,c,d</sup> | 0.0034 (0.0008) | 0.0012 (0.0004) | 0.0021 (0.0005) | 0.0087 (0.0013)  |
| Cysteine <sup>d</sup>          | 4.2 (0.6)       | 1.9 (0.4)       | ULOQ            | 9.6 (1.3)        |
| Betaine <sup>a,e</sup>         | 0.044 (0.004)   | 0.028 (0.001)   | 0.042 (0.008)   | 0.041 (0.008)    |
| Choline                        | 2.4 (0.5)       | 2.3 (0.3)       | 2.3 (0.3)       | 2.3 (0.4)        |
| Dimethylglycine                | 2.3 (0.2)       | 2.3 (0.3)       | 2.2 (0.3)       | 2.4 (0.5)        |
| Homocysteine <sup>a</sup>      | 0.19 (0.03)     | 0.72 (0.06)     | 0.29 (0.01)     | 0.28 (0.07)      |
| Met <sup>a,e,f</sup>           | 0.61 (0.10)     | 2.10 (0.36)     | 0.89 (0.10)     | 1.24 (0.20)      |
| SAM <sup>a,c,d</sup>           | 0.031 (0.006)   | 0.008 (0.002)   | 0.014 (0.002)   | 0.099 (0.023)    |
| AMP                            | 0.036 (0.012)   | 0.031 (0.002)   | 0.034 (0.007)   | 0.034 (0.005)    |
| NADH <sup>a,c,d</sup>          | 0.46 (0.03)     | 0.32 (0.04)     | 0.40 (0.03)     | 2.82 (0.56)      |
| SAH <sup>b,c,d</sup>           | 0.014 (0.004)   | 0.006 (0.002)   | 0.004 (0.001)   | 0.039 (0.004)    |
| Riboflavin <sup>a,e</sup>      | 0.015 (0.003)   | 0.033 (0.006)   | 0.017 (0.001)   | 0.020 (0.002)    |
| Gly <sup>a</sup>               | 98 (15)         | 217 (9)         | 138 (6)         | 143 (7)          |
| Ser <sup>a,d</sup>             | 501 (67)        | 943 (98)        | 537 (53)        | 528 (42)         |

**Concentrations are shown in  $\mu\text{M}/\text{mg}$  of protein  $\pm$  SEM (n=5, in triplicate)**

Decimals were set according to the first significant digit of the measured SEM

<sup>a</sup> Changes between HMLE and HMLE-EMT are statistically significant (p-value < 0.05)

<sup>b</sup> Changes between HMLE and HMLER are statistically significant (p-value < 0.05)

<sup>c</sup> Changes between HMLER and HMLER-EMT are statistically significant (p-value < 0.05)

<sup>d</sup> Changes between HMLE-EMT and HMLER-EMT are statistically significant (p-value < 0.05)

<sup>e</sup> Changes between HMLER and HMLE-EMT are statistically significant (p-value < 0.05)

<sup>f</sup> Changes between HMLE and HMLER-EMT are statistically significant (p-value < 0.05)

Met: methionine; SAM:5-adenosyl-methionine; AMP:3' 5' adenosine monophosphate; NADH; nicotinamide adenine dinucleotide phosphate, reduced; SAH: 5-adenosyl-homocysteine; Gly: glycine; Ser: serine; ULOD: Upper Limit of Detection

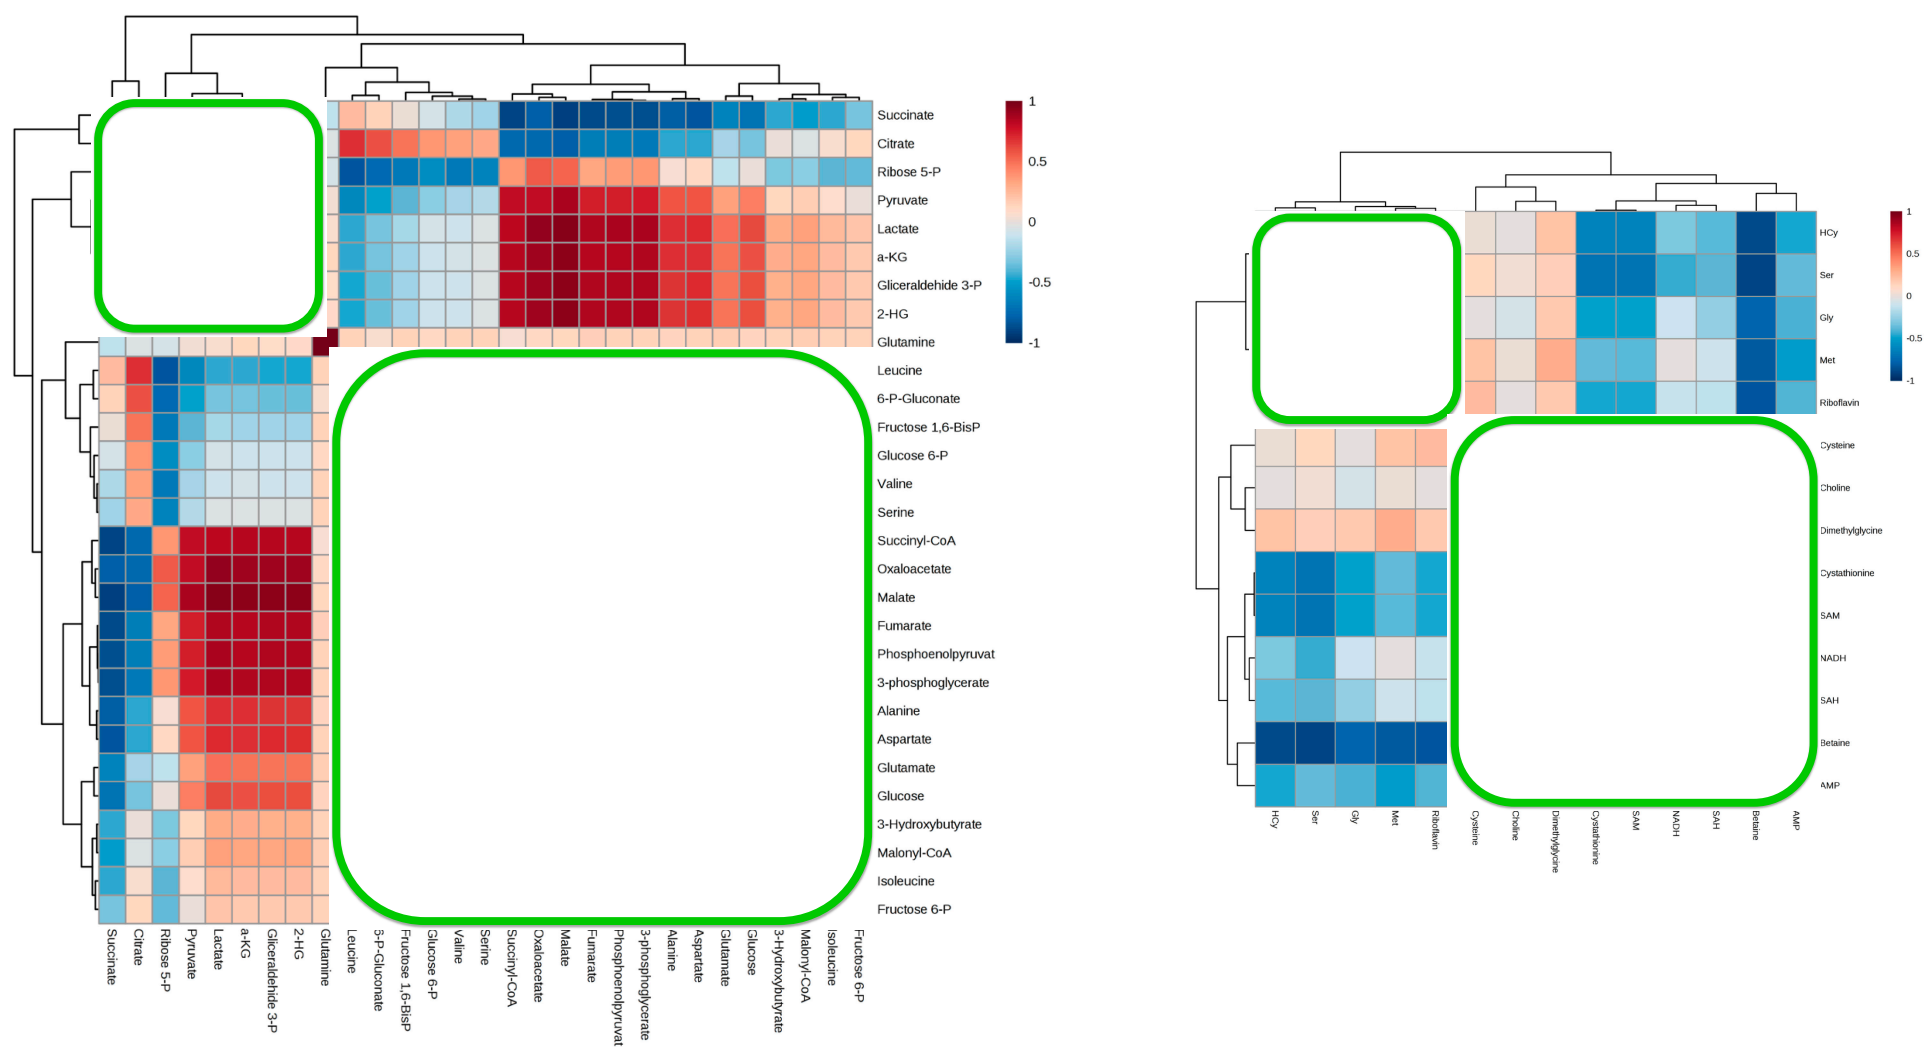

**Figure S1. Correlation of the metabolomic data.** Correlation matrix between all bioenergetic (*left*) and homocysteine-methionine 1C (*right*) metabolites collected from HMLE/HMLE-EMT and HMLER/HMLER-EMT cells based on the game's metrics. The color correlates to the intensity of metabolite concentration, where red indicates high intensity and blue indicates low intensity.
